# Supplementary material for: Nanotoxicologic Effects of PLGA Nanoparticles Formulated with a Cell-Penetrating Peptide: Searching for a Safe pDNA Delivery System for the Lungs
Source: PubMed Central journal article supplement (PMC6359528; doi:10.3390/pharmaceutics11010012), 2019-01-03
Supplement: pharmaceutics-11-00012-s001.pdf [file pharmaceutics-11-00012-s001.pdf]

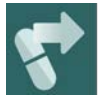

# Supplementary Materials: Nanotoxicologic Effects of PLGA Nanoparticles Formulated with a Cell-Penetrating Peptide: Searching for a Safe pDNA Delivery System for the Lungs

Larissa Gomes dos Reis, Wing-Hin Lee, Maree Svolos, Lyn Margaret Moir, Rima Jaber, Norbert Windhab, Paul Michael Young and Daniela Traini

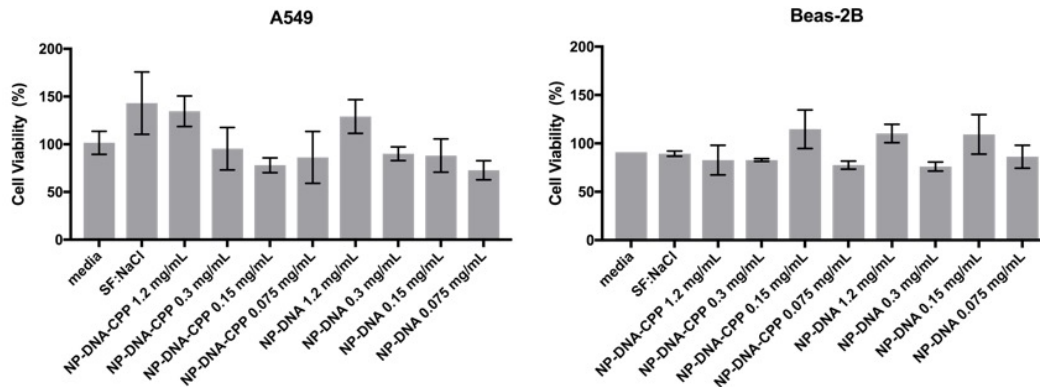

Figure S1: Cytotoxicity of NP-DNA and NP-DNA-CPP in (left panel) A549 and (right panel) Beas-2B cells.

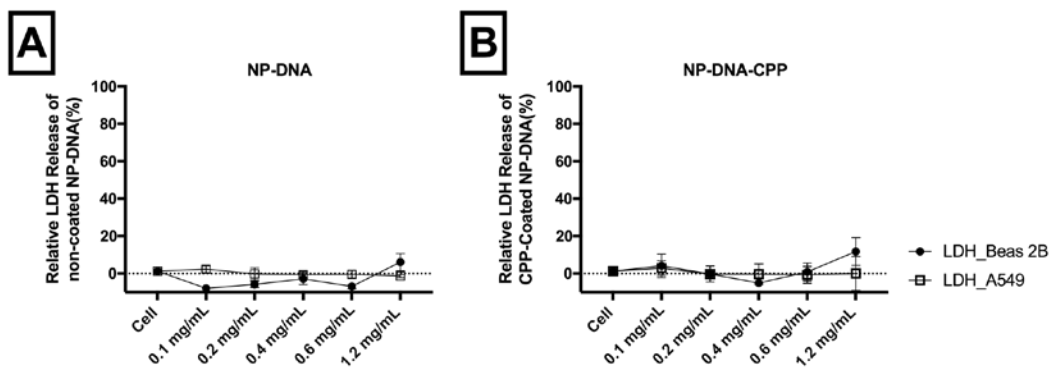

Figure S2: Membrane integrity, via LDH Leakage assay, of both Beas-2B (circles) and A549 cells (squares) exposed to (A) NPs or (B) NPs-CPP at different concentrations. ( $n = 3 \pm \text{StDev}$ ).

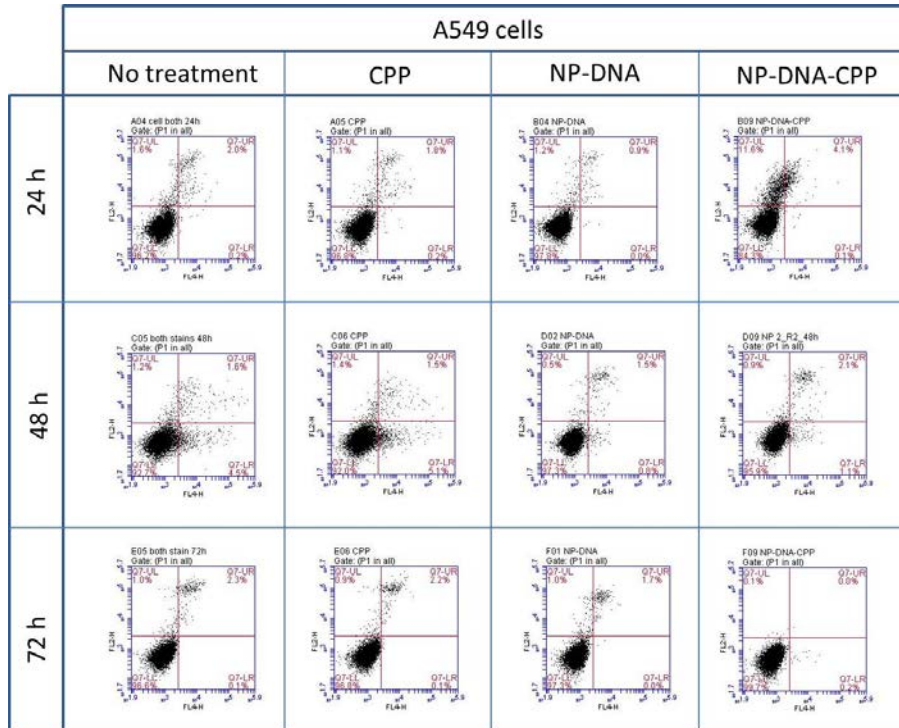

**Figure S3:** Dot flow cytometric plots of A549 cells at 24, 48 and 72 h, when exposed to the control with no treatment, CPP alone, NP-DNA and NP-DNA-CPP.

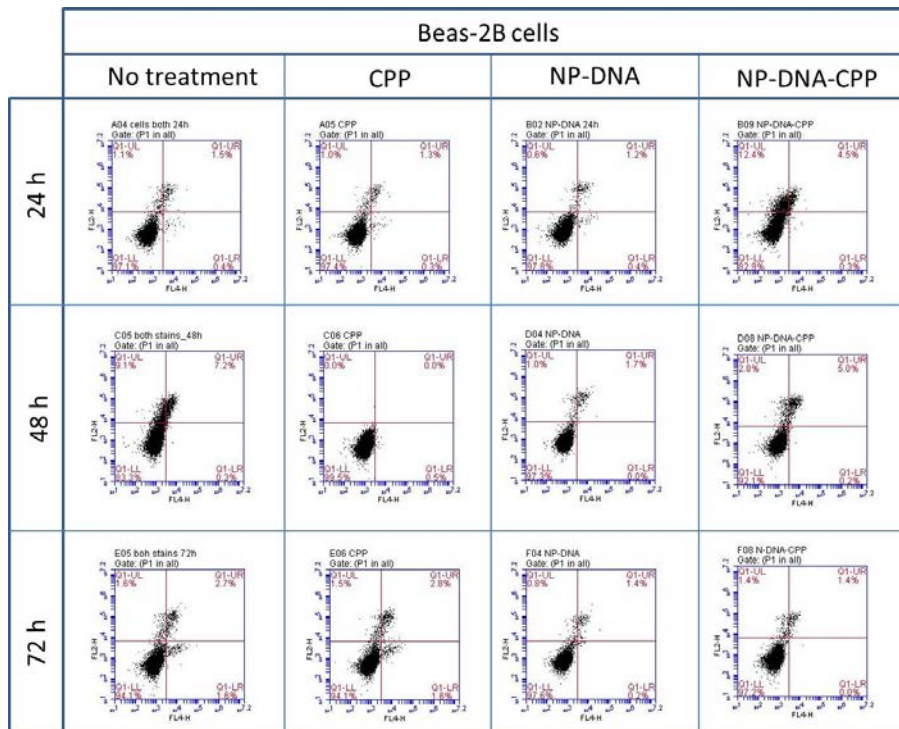

**Figure S4:** Dot flow cytometric plots of Beas-2B cells at 24, 48 and 72 h, when exposed to the control with no treatment, CPP alone, NP-DNA and NP-DNA-CPP.

### A549 plots cell cycle

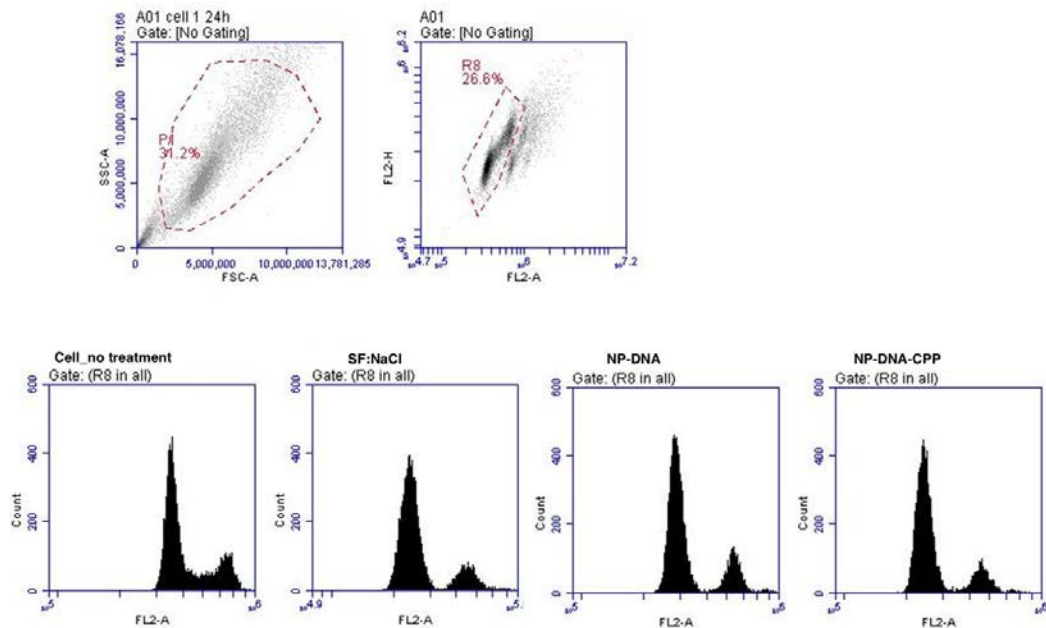

**Figure S5:** Flow cytometric plots of cell cycle analysis of A549 cells. On the top panel, on the left, cells were firstly gated to remove debris using SSC x FSC. Sequentially, on the top right, cells were gated to select single cells using FL2-A x FL2-H. The plots on the bottom panel show the cell cycle histogram of (from left to right) cell, NaCl:SF, NP-DNA and NP-DNA-CPP.

### Beas-2B plots cell cycle

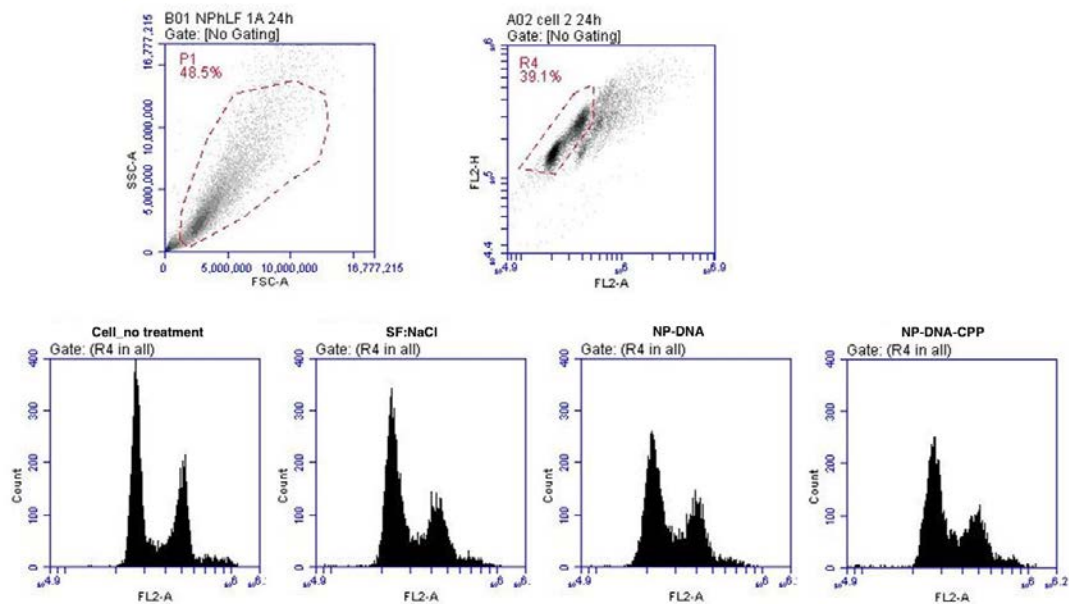

**Figure S6:** Flow cytometric plots of cell cycle analysis of Beas-2B cells. On the top panel, on the left, cells were firstly gated to remove debris using SSC x FSC. Sequentially, on the top right, cells were gated to select single cells using FL2-A x FL2-H. The plots on the bottom panel show the cell cycle histogram of (from left to right) cell, NaCl:SF, NP-DNA and NP-DNA-CPP.

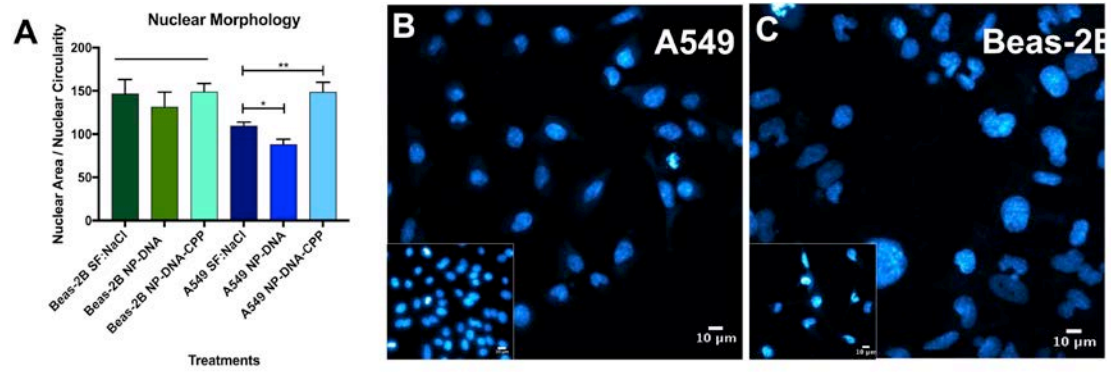

**Figure S7:** (A) Quantification of DNA fragmentation using Fiji ImageJ from the confocal images ( $n = 3$ ;  $\pm$  StDev;  $*P < 0.05$ ;  $**P < 0.01$ ); and Confocal Microscopy images of the nucleus of cells exposed to NP coated with CPP (NP-CPP; large image) or control (SF:NaCl; inner image) in both (B) A549 and (C) Beas-2B cells.
